# Supplementary material for: Quantitative trait loci associated with straighthead-resistance used for marker assisted selection in rice (Oryza sativa L.) RIL populations
Source: PeerJ. 2023 Mar 7;11:e14866. doi: 10.7717/peerj.14866 (PMC10000304; doi:10.7717/peerj.14866)
Supplement: Supplemental Information 1 [file peerj-11-14866-s001.xlsx]

## Sheet: Sheet1
TABLE S1 Polymorphic SSR markers linked to the straighthead-resistant QTLs in Zhe733/R312 and Cocodrie/Jing185 populations.
Marker	Chr	Motif	Forward Primer	Reverse Primer
AP3858-1	8	ga	cgttgaggaagccgaggccg	aggaaggtcccaccgaaccct
RM282	3	ga	ctgtgtcgaaaggctgcac	cagtcctgtgttgcagcaag
RM225	6	ct	tgcccatatggtctggatg	gaaagtggatcaggaaggc
RM2	7	ga	acgtgtcaccgcttcct	atgtccgggatctcatcg
RM206	11	ct	cccatgcgtttaactattct	cgttccatcgatccgtatgg
