# Supplementary material for: Quantitative trait loci associated with straighthead-resistance used for marker assisted selection in rice (Oryza sativa L.) RIL populations
Source: PeerJ. 2023 Mar 7;11:e14866. doi: 10.7717/peerj.14866 (PMC10000304; doi:10.7717/peerj.14866)
Supplement: Supplemental Information 2 [file peerj-11-14866-s002.xlsx]

## Sheet: Sheet1
TABLE S2 Genotype and phenotype in MASA-induced Zhe733/R312 population.
RIL No.	RM225	RM002	RM206	AP3858-1	Straighthead rating
ZR-6	a	b	b	b	8
ZR-9	b	b	a	b	8.3
ZR-11	a	a	b	a	1.5
ZR-12	b	b	b	b	8.7
ZR-14	a	a	a	b	3.2
ZR-16	a	b	a	a	2
ZR-17	b	a	b	a	1.2
ZR-18	b	a	a	a	1.3
ZR-19	b	a	b	b	8.5
ZR-20	b	a	b	a	2.7
ZR-35	a	a	b	a	1.2
ZR-39	a	b	b	b	8.3
ZR-41	a	a	b	a	1.5
ZR-45	a	a	a	a	2.2
ZR-46	a	a	a	b	2
ZR-48	b	a	b	a	6.5
ZR-49	a	a	b	a	1.5
ZR-50	b	b	a	b	8.3
ZR-52	b	a	b	a	7.5
ZR-53	b	a	b	b	8.8
ZR-55	b	a	b	a	7.4
ZR-57	b	a	b	a	6.3
ZR-59	b	a	a	b	6.8
ZR-61	a	a	b	a	1.3
ZR-62	b	a	b	b	8
ZR-63	a	a	b	b	1.5
ZR-64	b	b	b	b	8.7
ZR-66	a	b	a	a	1.5
ZR-69	b	a	a	a	1.3
ZR-70	b	a	b	a	1.8
ZR-76	b	a	a	b	8.5
ZR-79	a	a	b	a	2
ZR-83	a	a	a	a	1.3
ZR-84	b	b	a	b	7.1
ZR-88	a	a	a	b	1.6
ZR-90	a	a	b	b	1.8
ZR-94	a	b	a	a	2.3
ZR-95	b	b	b	a	2.8
ZR-97	b	b	a	b	8.5
ZR-98	b	b	a	b	8.7
ZR-99	a	a	a	b	3.2
ZR-105	b	b	b	b	8.7
ZR-108	a	a	a	a	1.3
ZR-109	b	b	a	a	6.3
ZR-110	b	b	a	a	6.9
ZR-111	a	a	b	b	8.7
ZR-112	a	b	b	a	1.6
ZR-114	b	b	b	b	8.2
ZR-115	a	b	a	b	9
ZR-117	a	a	b	a	2.8
ZR-118	a	a	a	a	1.7
ZR-120	a	b	b	a	8.3
ZR-121	b	b	a	a	7.8
ZR-128	b	b	b	a	8.2
ZR-132	a	b	a	b	6
ZR-134	a	a	a	a	2.2
ZR-136	a	b	b	a	2.2
ZR-137	b	a	b	b	8
ZR-138	h	a	b	a	6.3
ZR-140	a	a	b	a	1.2
ZR-142	b	a	b	b	9
ZR-143	b	a	b	b	8.7
ZR-144	b	a	a	a	1.3
ZR-146	a	b	b	b	8.8
ZR-152	b	b	b	a	7.7
ZR-153	b	a	a	a	1.9
ZR-154	a	a	b	a	1.2
ZR-157	b	b	b	b	8.7
ZR-158	a	a	a	a	2.2
ZR-163	a	a	b	a	1.2
ZR-170	a	b	a	a	2.7
ZR-171	a	b	b	a	7.2
ZR-174	b	a	a	a	1.3
ZR-175	a	b	a	b	9
ZR-176	a	b	a	a	8.2
ZR-182	a	a	a	a	1.7
ZR-188	b	a	a	b	8.3
ZR-190	b	b	b	b	8.3
ZR-196	a	b	b	b	8.3
ZR-197	b	a	b	a	1.3
ZR-203	b	a	b	a	1.5
ZR-205	b	a	b	a	1.5
ZR-206	a	a	a	b	2.7
ZR-213	b	a	a	a	1.5
ZR-214	a	b	a	a	2.1
ZR-217	b	a	b	a	7.7
ZR-224	b	a	b	b	8.3
ZR-227	b	b	b	b	9
ZR-228	b	a	b	b	8.5
ZR-229	b	a	a	a	1.7
ZR-236	b	a	b	b	8.2
ZR-237	b	a	b	b	8.7
ZR-238	a	b	b	b	7
ZR-239	a	b	a	a	1.5
ZR-241	a	a	a	a	1.3
ZR-244	b	b	a	a	2.2
ZR-247	a	b	b	a	3.7
ZR-248	a	b	a	a	2.3
ZR-249	a	b	a	b	8
ZR-251	b	b	a	b	8.3
ZR-252	b	b	a	b	8.7
ZR-254	a	b	a	a	1.8
ZR-257	b	a	a	b	8.8
ZR-258	a	a	a	b	2.8
ZR-259	a	a	a	b	2.2
ZR-262	b	a	a	a	1.7
ZR-264	a	b	a	a	1.5
ZR-267	b	b	b	b	8.8
ZR-268	a	b	a	b	8.5
ZR-269	a	b	b	a	6.7
ZR-270	a	b	b	b	8.7
ZR-275	a	b	b	a	7
ZR-276	b	a	b	b	9
ZR-277	b	b	b	b	9
ZR-279	b	a	b	a	6.2
ZR-287	b	a	a	a	2.7
ZR-290	b	b	b	b	9
ZR-291	b	a	a	a	1.2
ZR-292	b	b	a	b	8.3
ZR-297	b	b	b	b	8
ZR-298	a	a	b	b	8.7
ZR-299	a	a	a	a	1.5
ZR-301	a	a	b	b	8.3
ZR-302	h	b	b	a	1.2
ZR-303	a	b	a	a	6.7
ZR-308	b	a	a	a	3
ZR-310	b	b	a	b	8.5
ZR-311	b	b	b	a	2.8
ZR-312	a	a	a	b	6.5
ZR-313	b	b	b	a	6.7
ZR-317	b	b	b	a	7.2
ZR-318	b	a	b	b	9
ZR-321	b	a	a	a	2
ZR-322	b	b	b	b	8.7
ZR-323	b	b	b	b	9
ZR-324	b	b	b	a	1.3
ZR-325	a	a	h	a	1.7
ZR-331	b	a	a	b	9
ZR-332	b	a	b	b	8.5
ZR-335	a	b	b	a	6
ZR-336	b	b	b	b	8.8
ZR-340	b	a	a	b	9
ZR-342	b	b	b	b	8
ZR-346	b	b	b	b	9
ZR-348	b	a	a	a	2.2
ZR-352	a	a	a	a	1
ZR-358	b	b	a	b	8.2
