# Supplementary material for: Quantitative trait loci associated with straighthead-resistance used for marker assisted selection in rice (Oryza sativa L.) RIL populations
Source: PeerJ. 2023 Mar 7;11:e14866. doi: 10.7717/peerj.14866 (PMC10000304; doi:10.7717/peerj.14866)
Supplement: Supplemental Information 3 [file peerj-11-14866-s003.xlsx]

## Sheet: Sheet1
TABLE S3 Genotype and phenotype of MASA-induced Cocodrie/Jing185 population.
RIL No.	RM282	AP3858-1	Straighthead rating
CJ-367	a	.	8.8
CJ-368	a	h	7.5
CJ-369	a	a	3.8
CJ-371	a	.	5.7
CJ-373	a	b	8.2
CJ-375	b	b	7.7
CJ-376	a	b	7.7
CJ-378	b	b	8.2
CJ-380	a	b	7.7
CJ-383	b	a	4
CJ-385	a	.	4.2
CJ-386	a	a	3.5
CJ-387	a	b	9
CJ-388	a	a	3
CJ-389	a	a	4
CJ-390	a	.	6.3
CJ-392	b	a	6.3
CJ-393	b	b	7.8
CJ-394	a	b	8.8
CJ-397	b	a	2.2
CJ-398	a	a	6.3
CJ-399	a	a	6.3
CJ-401	h	.	4.8
CJ-403	a	.	7.2
CJ-404	a	a	3.7
CJ-405	b	b	7.2
CJ-407	b	a	1.8
CJ-410	b	.	8.2
CJ-415	a	b	8.8
CJ-418	b	a	6.2
CJ-421	a	b	8.5
CJ-423	b	a	6.5
CJ-427	a	a	2
CJ-428	b	b	9
CJ-429	b	.	9
CJ-438	a	.	8
CJ-439	a	a	7.5
CJ-443	a	.	8.7
CJ-447	a	a	6.3
CJ-449	a	b	8.8
CJ-451	a	a	7.3
CJ-452	a	.	7.7
CJ-453	a	a	6.2
CJ-454	a	.	2
CJ-457	a	.	5
CJ-458	a	.	4.7
CJ-459	a	.	5.2
CJ-465	b	b	7.8
CJ-466	b	.	3
CJ-469	a	a	1.7
CJ-471	b	b	8.2
CJ-473	a	b	7.7
CJ-474	b	b	8.5
CJ-477	a	b	7.5
CJ-478	a	a	3.8
CJ-479	b	a	2.7
CJ-480	b	a	3.5
CJ-481	b	b	7.3
CJ-487	b	b	8.7
CJ-488	a	h	8.7
CJ-492	b	b	8.8
CJ-497	a	.	5.3
CJ-499	a	b	8.7
CJ-502	a	.	4.8
CJ-506	b	a	2.3
CJ-513	h	b	7.8
CJ-514	b	b	8.2
CJ-519	b	a	1.8
CJ-522	a	a	2.7
CJ-523	a	a	4
CJ-524	b	b	9
CJ-526	h	a	4
CJ-527	a	.	4.8
CJ-529	b	b	7.2
CJ-530	b	a	2.5
CJ-532	b	b	7.2
CJ-533	a	a	7.5
CJ-534	a	.	4.8
CJ-540	.	a	6.5
CJ-541	b	b	8.3
CJ-542	a	a	3.7
CJ-543	a	a	4
CJ-545	a	b	8.7
CJ-546	a	b	8.2
CJ-547	a	.	4.8
CJ-548	a	a	4
CJ-549	a	a	4
CJ-550	a	a	4
CJ-551	a	.	5.7
CJ-559	a	b	8.8
CJ-561	a	b	9
