# Supplementary material for: Quantitative trait loci associated with straighthead-resistance used for marker assisted selection in rice (Oryza sativa L.) RIL populations
Source: PeerJ. 2023 Mar 7;11:e14866. doi: 10.7717/peerj.14866 (PMC10000304; doi:10.7717/peerj.14866)
Supplement: Supplemental Information 4 [file peerj-11-14866-s004.xlsx]

## Sheet: Sheet1
TABLE S4 Agronomic traits of Cocodrie/Jing185 population.
No.	Heading Days	Heading Days	Heading Days	AVE.	Plant height cm Rep1	Plant height cm Rep2	Plant height cm Rep3	AVE.	# of Tillers Rep1	# of Tillers Rep2	# of Tillers Rep3	AVE.	Total Biomass (g) Rep1	Total Biomass (g) Rep2	Total Biomass (g) Rep3	AVE.
Cocodrie	223	222	224	223	106	100.667	101.333	102.667	21.3333	12.6667	25.6667	19.8889	179.6	101.3	163.033	147.978
Jing185	226	226	228	226.667	104.667	105.667	92	100.778	55	66.3333	34.6667	52	258.5	336.533		297.517
367	219	218	217	218		87	90.6667	88.8333		45	45	45		177.5	167.7	172.6
368	229	228	229	228.667	101.667	108	102.667	104.111	34.3333	33.6667	47.3333	38.4444	284	183.4	207.233	224.878
369	217	217	217	217	115.333	112.333	117.667	115.111	27.3333	43.3333	51.6667	40.7778	170.5	209	211.433	196.978
371	216	219	217	217.333	119	108.5	119.333	115.611	27	21	30	26	170.233	137.6	231.4	179.744
373	216	219	216	217	93	87.6667	95.6667	92.1111	19	17.3333	34.6667	23.6667	89.7333	92.2	188.4	123.444
375	224	225	222	223.667		91.3333	85	88.1667		36	45.6667	40.8333		174.9	205.367	190.133
377	218	221	221	220	129	120.333	122.333	123.889	24.3333	17.3333	16.6667	19.4444	146.967	147.9	115.867	136.911
378	225	227	227	226.333	109.667	109.667	114.667	111.333	29.3333	19.3333	32.6667	27.1111	166.033	151	228.65	181.894
380	219	217	216	217.333	114	118	109	113.667	28.3333	32.6667	27.6667	29.5556	183	196.233	178.7	185.978
383	215	215	217	215.667	107.667	103.333	101	104	29	25	22.6667	25.5556	192.567	145.05	139.767	159.128
385	213	213	214	213.333	120	118.333	118.667	119	19.3333	19.3333	26.3333	21.6667	137.4	157.833	173.5	156.244
386	214	213	214	213.667	124.333	125.333	125.333	125	22.6667	30	30	27.5556	156.05	215.8	265.767	212.539
287	215	213	214	214	115	127	124.667	122.222	49	32	41	40.6667	275.3	229.35	297.533	267.394
388	217	217	217	217	113.333	113	115.667	114	22	26.5	23.6667	24.0556		175.9	142.5	159.2
389	213	211	213	212.333	94	95	96.6667	95.2222	20.6667	46.5	36	34.3889	130.25	221.9	158.1	170.083
390	221	220	217	219.333	95	98.5	99	97.5	23	14.5	26	21.1667	144.7	147.5	183.6	158.6
392	217	216	217	216.667	84.3333	84	82.3333	83.5556	22	12.3333	16.6667	17	124.5	72.8	96.7333	98.0111
393	223	221	220	221.333	90.5	89.3333	91	90.2778	27	30	31	29.3333	155	165.967	171.55	164.172
394	235	234	236	235	94.3333	95	93.6667	94.3333	20.3333	27.3333	32	26.5556	127.767	160	136.467	141.411
397	213	214	218	215	87.3333	93	74.3333	84.8889	38	36	21.3333	31.7778	133.133	203.1		168.117
398	229	221	228	226	87.3333	83	84	84.7778	34.3333	22	36	30.7778	121	109.6	175.967	135.522
399	224	223	224	223.667	104	96	97.3333	99.1111	24	36	27.6667	29.2222	153.65	176.4	155.7	161.917
401	216	216	219	217		73	72	72.5		41.6667	103	72.3333		128.967	264.4	196.683
403	213	214	214	213.667	92	91	91.6667	91.5556	31.6667	30	33.3333	31.6667	142.6	158	168.833	156.478
404	215	215	216	215.333	95.3333	89.3333	89.6667	91.4444	21.6667	21.3333	24.6667	22.5556	122.367	110.167	144.833	125.789
405	220	220	217	219	97	95.3333	104.333	98.8889	31	27.3333	30.6667	29.6667	123.4	127.533	156.733	135.889
407	223	213	214	216.667		87.3333	88.6667	88		28.6667	33.3333	31	110	91.5	141.233	114.244
410	249	249	249	249	115.333	114.667	115.667	115.222	36.6667	18.3333	25	26.6667	270.133	147.367	210.3	209.267
415	235	232	234	233.667	111	112	103	108.667	38.3333	33	33.6667	35	179.767	131.15	208.35	173.089
418	214	216	216	215.333	97.3333	93.3333	88	92.8889	26	22	36.3333	28.1111	151.7	120.9	141.85	138.15
421	227	230	231	229.333	94	94.6667	95.6667	94.7778	25	27	19	23.6667	125.9	120.6	145.95	130.817
423	216	213	216	215	97	96	92.6667	95.2222	27.3333	39.5	37.3333	34.7222	118.3	174.5	156.567	149.789
427	215	213	216	214.667	97	98.6667	94.6667	96.7778	32	24.3333	33	29.7778	132	137	207.9	158.967
428	247	249	249	248.333	98.6667	101.667	100	100.111	22.6667	28.3333	23	24.6667	148.5	170.733	141.3	153.511
429	238	238	225	233.667	117.667	113.667	113	114.778	27	29.3333	26.6667	27.6667	152.5	177.15	169	166.217
438	227	227	227	227	114.667	117	111	114.222	37.3333	34	28.3333	33.2222	213.433		181.55	197.492
439	243	240	243	242	91.6667	94.3333	97.3333	94.4444	26.6667	25	21.3333	24.3333	150.633	127.15	138.333	138.706
443	229	229	228	228.667	105.5	101.5	95	100.667	58	24	29.3333	37.1111	269.25	116.7	139.2	175.05
447	215	214	218	215.667	84.3333	86.5	86	85.6111	22.6667	43	20.3333	28.6667	99.5667	158.9	79.6333	112.7
449	220	220	221	220.333	107.333	111	100	106.111	28.6667	30	24	27.5556	157.767	205.65	154.2	172.539
451	218	220	217	218.333	96		92	94	34		26	30	143.9		104.033	123.967
452	224	224	227	225	83	83.6667	86	84.2222	35.5	26	40.5	34	149.55	115.4	269.1	178.017
453	211	212	213	212	107.667	106	104.667	106.111	21.6667	21.6667	25.6667	23	145.1	131.1	160.867	145.689
454	216	215	216	215.667	105.333	108.333	102.333	105.333	24	37.6667	22.3333	28	111.467	200.8	142	151.422
457	229	226	228	227.667	87.6667	88.6667	92.3333	89.5556	40.3333	38	33.3333	37.2222	124.633		168.733	146.683
458	217	217	216	216.667	101	107.667	100	102.889	35.5	28.6667	37	33.7222	210.45	165.6	217.4	197.817
459	213	213	217	214.333	106	106.667	101	104.556	28.5	26.6667	26	27.0556	178.5	197.6	149.8	175.3
465	229	228	228	228.333	101	96.6667	97.6667	98.4444	29.3333	32.6667	35	32.3333	134.1	106.9	145.35	128.783
466	213	213	211	212.333	94.6667	97.6667	95.3333	95.8889	42.3333	28.6667	27.6667	32.8889	159.433	151.033	134.1	148.189
469	223	220	220	221	79	81	83.6667	81.2222	40	39	45.6667	41.5556	195.5	150.6	200.367	182.156
471	211	208	217	212	86	86	99	90.3333	22	39.5	54.3333	38.6111	84.6	134.7	195.467	138.256
473	222	220	219	220.333	115.333	103.667	118.667	112.556	21.6667	16.6667	23	20.4444	177.067	123.333		150.2
474	247	247	245	246.333	100.667	117	114.667	110.778	30	24	20.3333	24.7778		188.55	143.467	166.008
477	217	218	217	217.333	112.5		114.667	113.583	28		19.6667	23.8333	150.2		137.4	143.8
478	227	224	227	226	118.333	114.667	120	117.667	30.6667	24.3333	30.6667	28.5556	251.467	225	168.55	215.006
479	235	235	240	236.667	126	127	130.667	127.889	25	23.3333	23.3333	23.8889	188.9	155.367	122.767	155.678
480	213	211	213	212.333	86.6667	102	98.6667	95.7778		27	23.3333	25.1667		126.767	142	134.383
481	227	229	230	228.667	101	105	98	101.333	33.3333	38	25.6667	32.3333	154.333	166.9	133.667	151.633
487	228	225	227	226.667	98	91.3333	95.6667	95	36.5	35.3333	27	32.9444	162.6	137.867	122.3	140.922
488	239	238	236	237.667	118.667	112	124.667	118.444	41.3333	34.3333	26.6667	34.1111	238.333	224.3	165.933	209.522
492	251	255	254	253.333	89.5		88	88.75	50.5		64.5	57.5	193.3		309.2	251.25
497	224	224	222	223.333	100	102	102	101.333	31.6667	28.3333	22.3333	27.4444	136.6	153.233	123.367	137.733
499	238	235	238	237	99.5	106	104.667	103.389	27.5	19	33.6667	26.7222		145.633	259.267	202.45
502	239	236	238	237.667	107.5	108.667	106.333	107.5	48	34.3333	33.6667	38.6667	226.6	162.367	151.7	180.222
506	215	215	215	215	65.3333	68	62	65.1111	22.6667	27	38.5	29.3889	109	90	109.2	102.733
513	225	221	222	222.667	93.3333	94	92	93.1111	31	27	23.3333	27.1111	120.133	117.633		118.883
514	235	235	230	233.333		104	96	100		22.6667	39	30.8333		184.75	263	223.875
519	217	218	217	217.333	104.667	112.333	109.667	108.889	16.6667	31.3333	27	25	124.35	276.6	199.6	200.183
522	218	218	217	217.667	97.3333	101	105.667	101.333	20	23.3333	25	22.7778	100.6	139.7	145.15	128.483
523	220	217	218	218.333	101.667	109.333	103	104.667	23.6667	26.3333	24	24.6667	148.1	179.1	144.9	157.367
524	239	245	238	240.667	109	109.667	115	111.222	35.5	33	42.5	37	272.25	224.867	290.2	262.439
526	220	217	220	219	112.333	114.667	119.667	115.556	22.3333	20.3333	20	20.8889	109	110.767	147.233	122.333
527	251	249	252	250.667	89.3333	99.3333	96.6667	95.1111	30.3333	30	27.3333	29.2222		178.2	163.1	170.65
529	215	214	218	215.667	112.333	107.667	102.5	107.5	26	25.6667	23.5	25.0556		121.867	188	154.933
530	214	213	213	213.333	99.3333	104.333	98	100.556	18	20.3333	27	21.7778		128.3	164.667	146.483
532	216	217	217	216.667	100	98.6667	95	97.8889	29.3333	30.3333	24.3333	28	151.4	191.7	125.833	156.311
533	225	227	228	226.667	115	113.333	108.667	112.333	30.3333	28.3333	43.6667	34.1111	151.133	220.633	181.5	184.422
534	224	224	225	224.333	111	118.667	121.333	117	37	29.6667	39.6667	35.4444	217.2	212.833	250.233	226.756
540	216	215	218	216.333	68.3333	70	67.3333	68.5556	37.6667	60	26	41.2222	147.5	178.267	63.8333	129.867
541	234	235	238	235.667	101.667	101.667	104	102.444	21.6667	34.3333	14	23.3333	110.367	146.167	98.75	118.428
542	212	210	212	211.333	111.667	105.667	109.333	108.889	29.3333	33.3333	31.3333	31.3333	191.833	177.233	178.633	182.567
543	203	208	215	208.667	84	86	92	87.3333	19	32	26.3333	25.7778	62.8667	105.7	116.067	94.8778
545	228	234	208	223.333	103	96	93	97.3333	22	24.3333	23	23.1111	111.7	143.8	118.95	124.817
546	216	214	213	214.333	95	85.5	91	90.5	36.5	29	38	34.5	136.55	140.7	155.15	144.133
547	224	223	224	223.667	120.667	117.333	120	119.333	37	14	22	24.3333	161.6	123.8	193.4	159.6
548	235	234	235	234.667	108.333	104	102	104.778	21.6667	21.6667	23.6667	22.3333	126.133	127.5		126.817
549	211	213	214	212.667	95.3333	98.3333	94.3333	96	22	22	39.6667	27.8889	88	106.5	130.967	108.489
550	213	217	215	215	120.5	110.333	115.333	115.389	33	31.6667	36.6667	33.7778	233.35	169.1	168.9	190.45
551	220	224	224	222.667	116	113.333	113.333	114.222	31.6667	31	20	27.5556	232	207.967	125.4	188.456
559	228	230	231	229.667	105.333	108.333	102.667	105.444	33.3333	36	33.6667	34.3333		265.85	145.4	205.625
561	226	219	217	220.667	103	107.667	108.5	106.389	46	32	29	35.6667	299.5	179.467	171.05	216.672
